# Supplementary material
Source: publisher site journal article supplement (http://static.cambridge.org/content/id/urn:cambridge.org:id:article:S1751731120000324/resource/name/S1751731120000324supp001.docx)
Supplement: Supplementary file 1 [file S1751731120000324supp001.docx]

**Live animal predictions of carcass components and marble score in beef cattle: Model development and evaluation**

M. J. McPhee, B. J. Walmsley, H.C. Dougherty, W. A. McKiernan and V. H. Oddy

*animal* journal


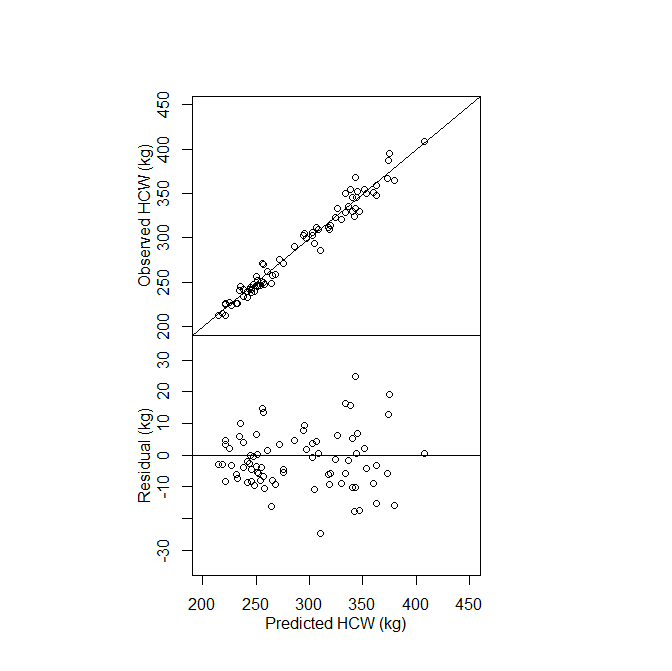


**Figure S1.** Observed *versus* predicted with 1:1 (solid) line and residuals (observed – predicted) of hot carcass weight (HCW, kg) from evaluation dataset 1(Angus steers)


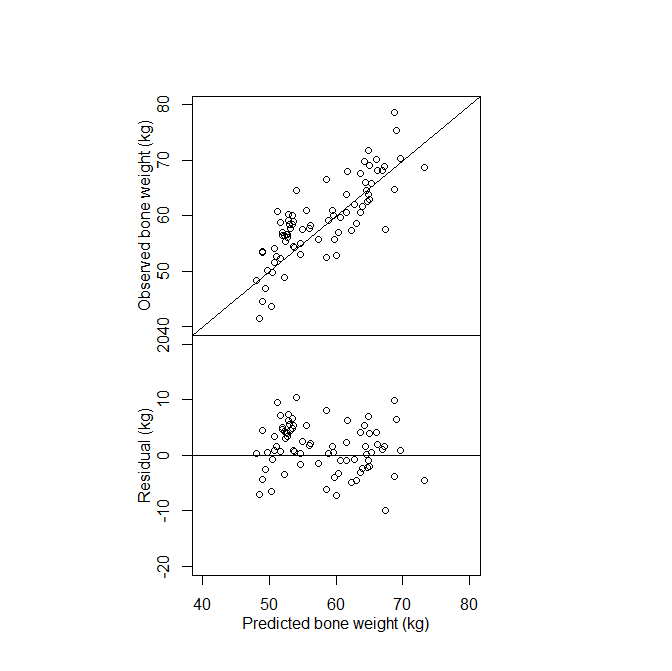


**Figure S2.** Observed *versus* predicted with 1:1 (solid) line and residuals of bone weight (kg) from evaluation dataset 1(Angus steers)


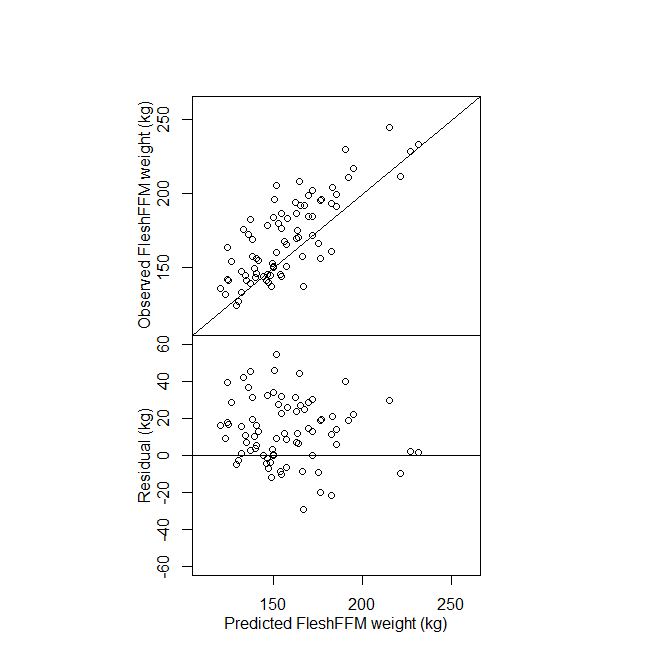


**Figure S3.** Observed *versus* predicted with 1:1 (solid) line and residuals of flesh fat-free mass (FleshFFM, kg) from evaluation dataset 1 (Angus steers)


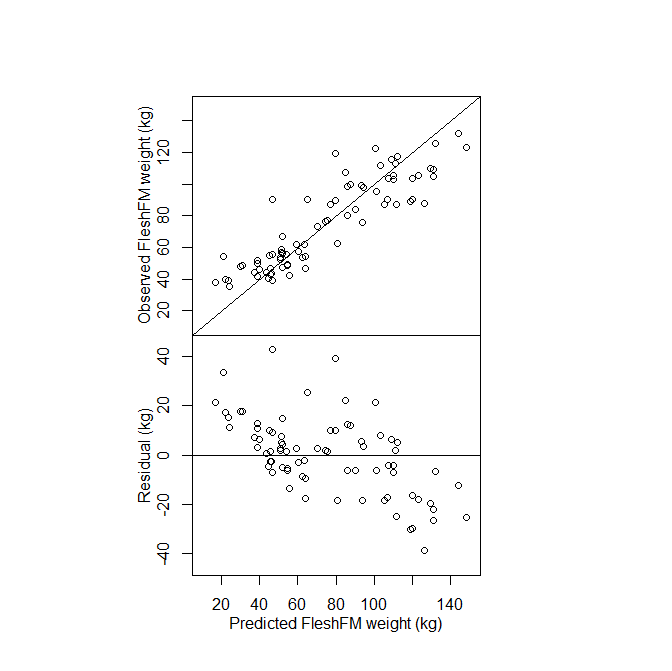
**Figure S4.** Observed *versus* predicted with 1:1 (solid) line and residuals of flesh fat mass (FleshFM, kg) from evaluation dataset 1 (Angus steers)


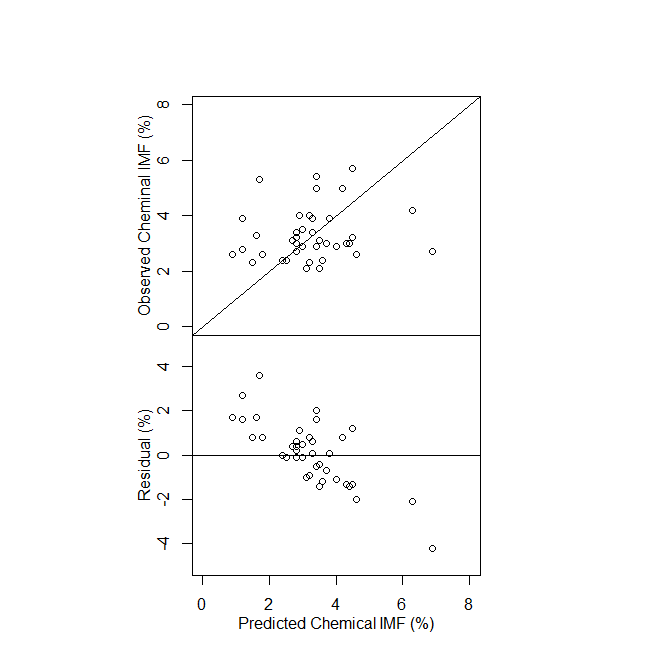


**Figure S5.** Observed *versus* predicted with 1:1 (solid) line and residuals of chemical intramuscular fat (Chemical IMF, %) from evaluation dataset 1 (Angus steers)


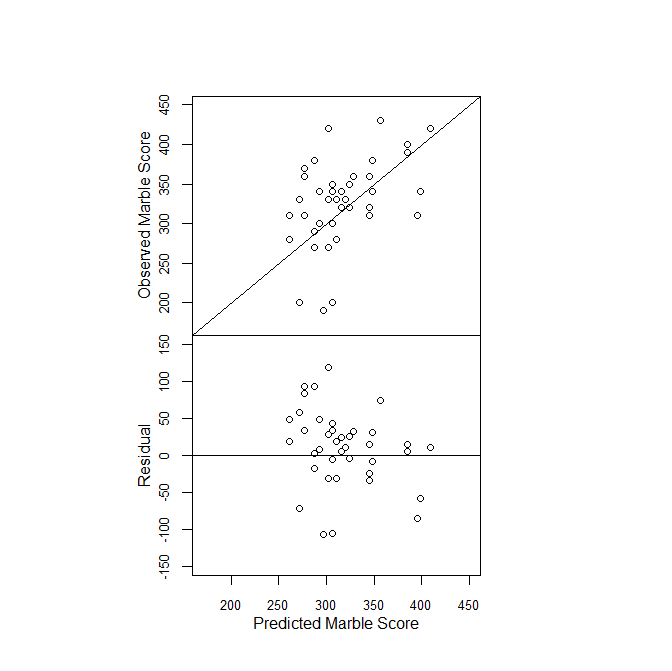


**Figure S6.** Observed *versus* predicted with 1:1 (solid) line and residuals of marble score from evaluation dataset 1 (Angus steers)


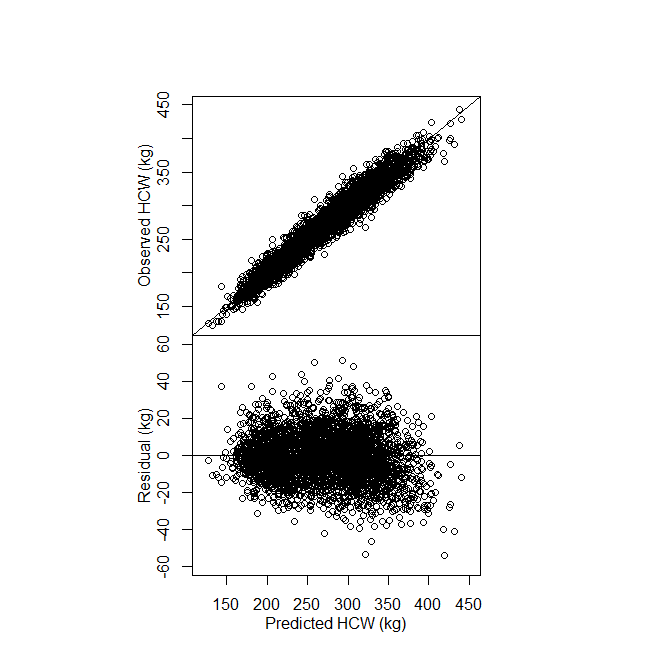


**Figure S7.** Observed *versus* predicted with 1:1 (solid) line and residuals of hot carcass weight (HCW, kg) from evaluation dataset 2 (Angus, Hereford, Murray Grey and Brahman heifers and steers)


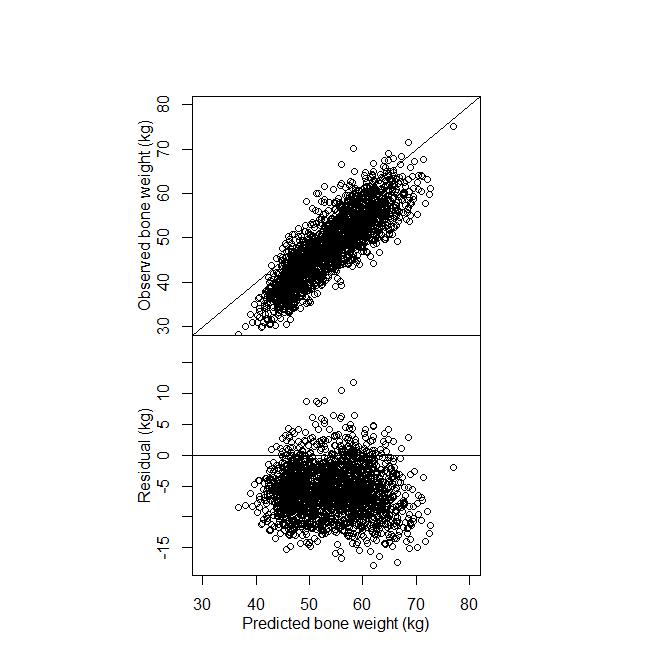


**Figure S8.** Observed *versus* predicted with 1:1 (solid) line and residuals of bone weight (kg) from evaluation dataset 2 (Angus, Hereford, Murray Grey and Brahman heifers and steers)


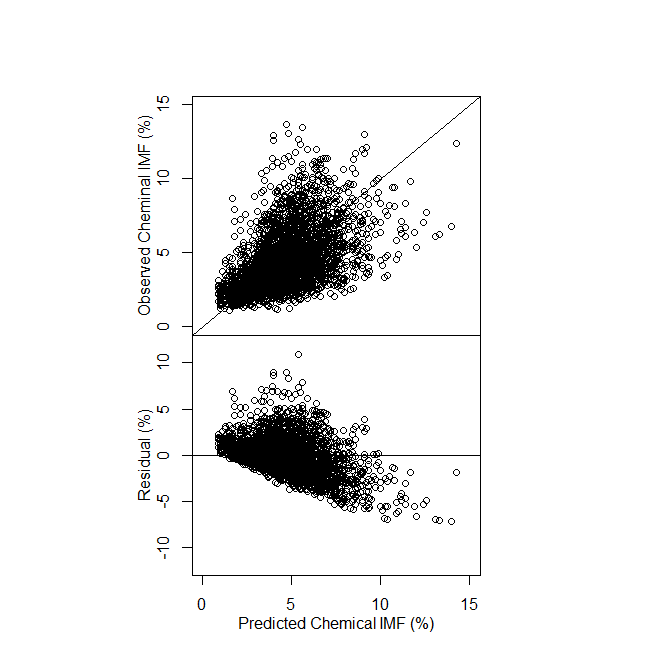


**Figure S9.** Observed *versus* predicted with 1:1 (solid) line and residuals of chemical intramuscular fat (Chemical IMF, %) from evaluation dataset 2 (Angus, Hereford, Murray Grey and Brahman heifers and steers)
